# Supplementary material for: Cost-effective preparation of layered tantalum oxynitrides for visible light-driven photocatalysis
Source: Royal Society of Chemistry journal article supplement (doi:10.1039/d2dt03470k), 2023-01-01
Supplement: d2dt03470k1.pdf [file d2dt03470k1.pdf]

## Supporting Information

### Cost-Effective Preparation of Layered Tantalum Oxynitrides for Visible-light-driven Photocatalysis

Wenqian Chen<sup>a,\*</sup>, Zihan Wang<sup>a</sup>, Peng Wang<sup>a</sup>, Jinkun Li<sup>a</sup>, Jiajun Wang<sup>a,\*</sup>, Liang  
Tang<sup>a,\*</sup>

<sup>a</sup> Key Laboratory of Organic Compound Pollution Control Engineering (MOE),  
School of Environmental and Chemical Engineering, Shanghai University, Shanghai  
200444, China.

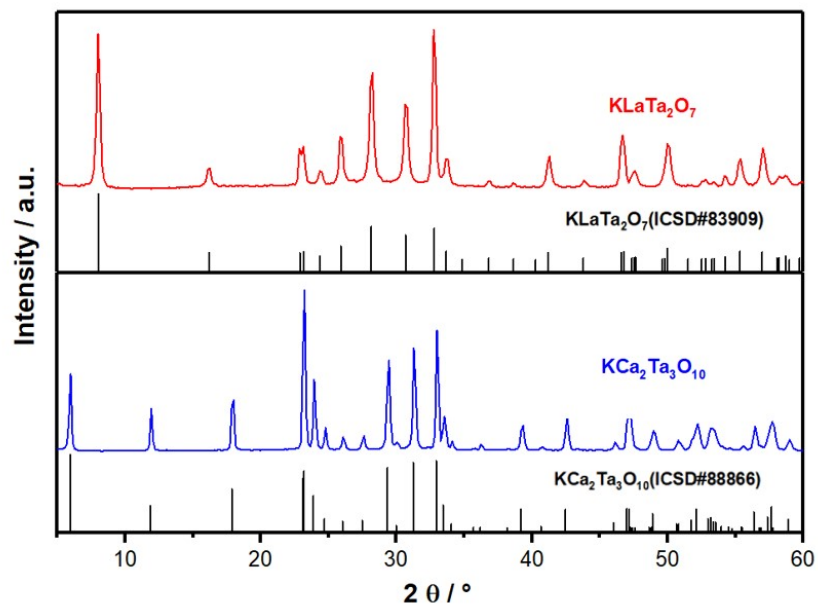

**Figure S1.** XRD patterns of the oxide precursors KLaTa<sub>2</sub>O<sub>7</sub>, and KCa<sub>2</sub>Ta<sub>3</sub>O<sub>10</sub>.

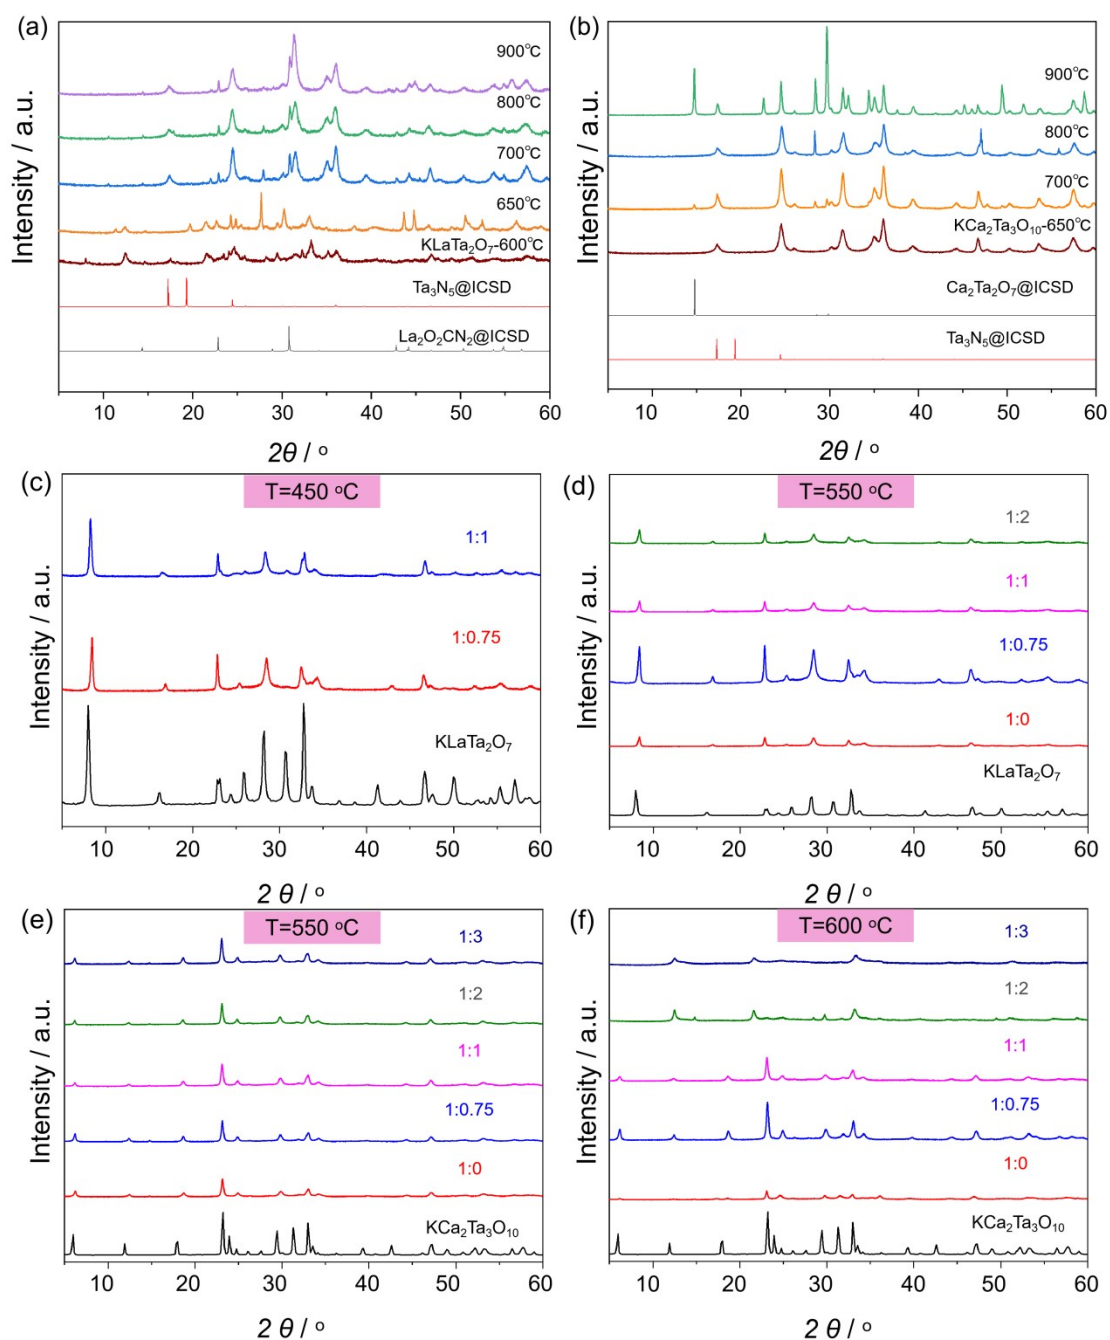

**Figure S2.** XRD patterns of the nitrated products of (a)  $\text{KLaTa}_2\text{O}_7$ , (b)  $\text{KCa}_2\text{Ta}_3\text{O}_{10}$  obtained at 600-900 °C for 3 h with a molar ratio of oxide/ $\text{K}_2\text{CO}_3$  is 1:1. XRD patterns of the nitrated products of (c) (d)  $\text{KLaTa}_2\text{O}_7$  and (e) (f)  $\text{KCa}_2\text{Ta}_3\text{O}_{10}$  with different addition of  $\text{K}_2\text{CO}_3$  obtained at the selected temperatures.

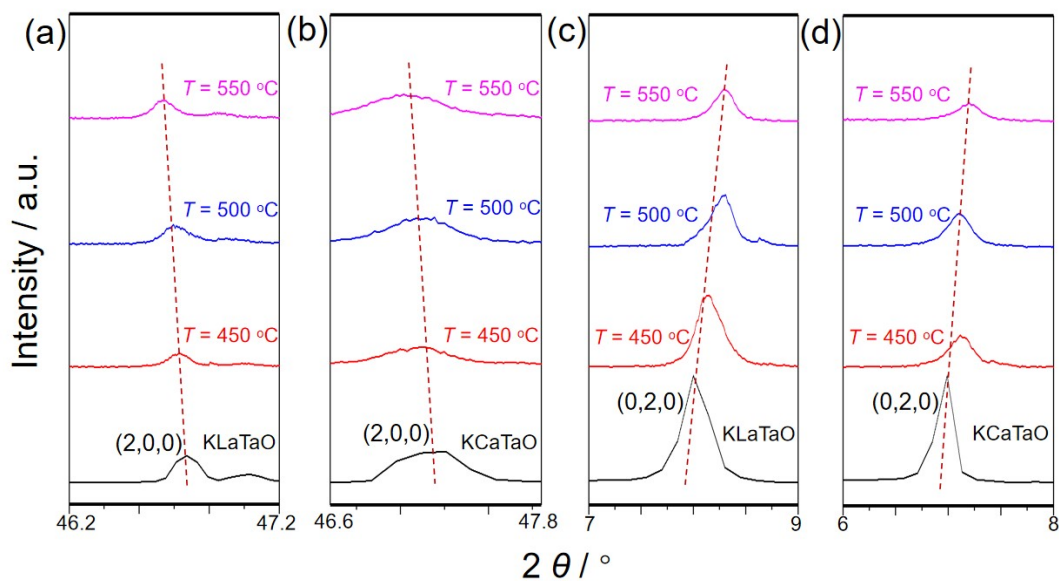

**Figure S3.** XRD patterns of (2,0,0) plane of (a)  $\text{KLaTa}_2\text{O}_7$  (b)  $\text{KCa}_2\text{Ta}_3\text{O}_{10}$ , and (0,2,0) plane of (c)  $\text{KLaTa}_2\text{O}_7$  (d)  $\text{KCa}_2\text{Ta}_3\text{O}_{10}$ , along with those after heating at 450, 500 and 550 °C for 3 h.

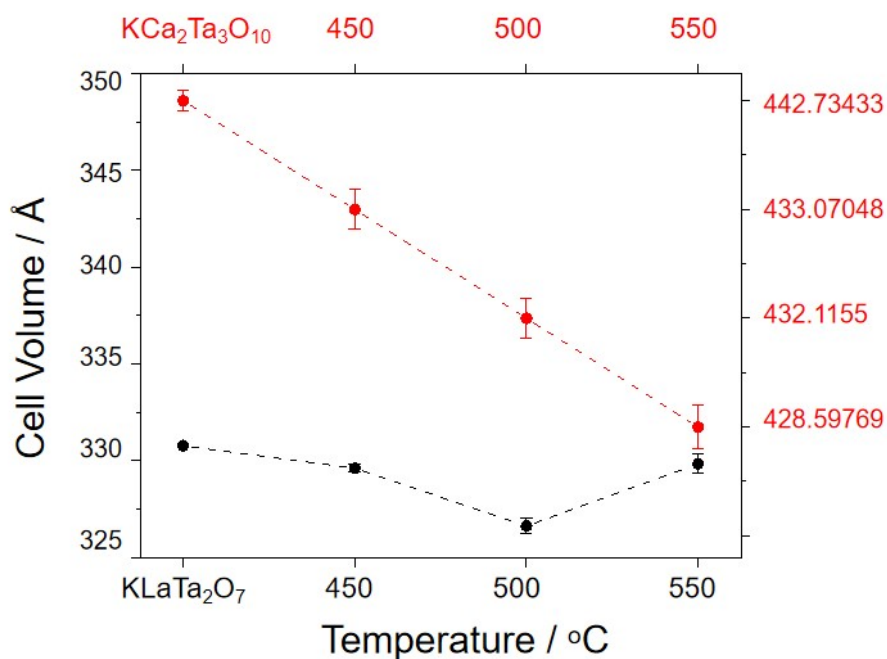

**Figure S4.** Evolution of the crystal cell volume as a function of reaction temperatures for nitrided products of  $\text{KLaTa}_2\text{O}_7$  and  $\text{KCa}_2\text{Ta}_3\text{O}_{10}$ .

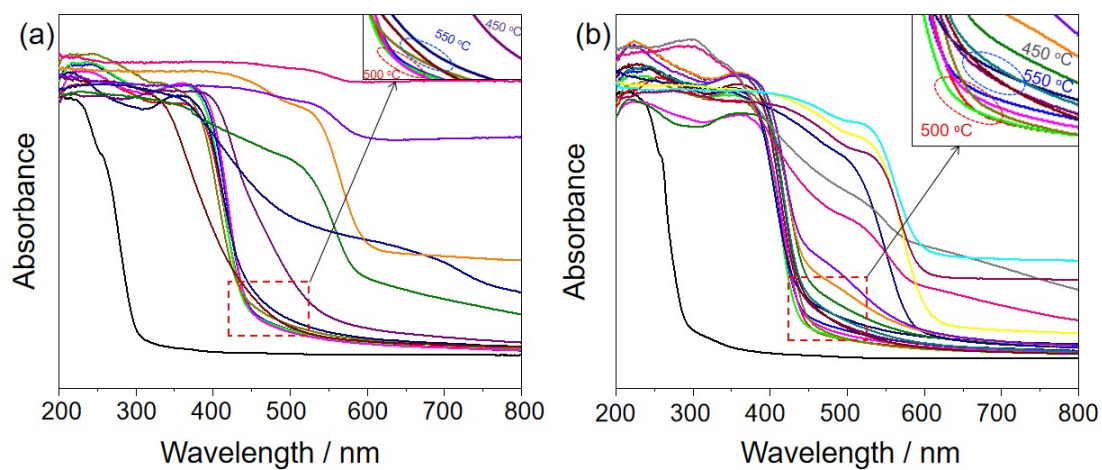

**Figure S5.** UV-vis DRS of (a)  $\text{KLaTa}_2\text{O}_7$  and (b)  $\text{KCa}_2\text{Ta}_3\text{O}_{10}$  and various nitrated samples. The small box shows a partial enlargement.

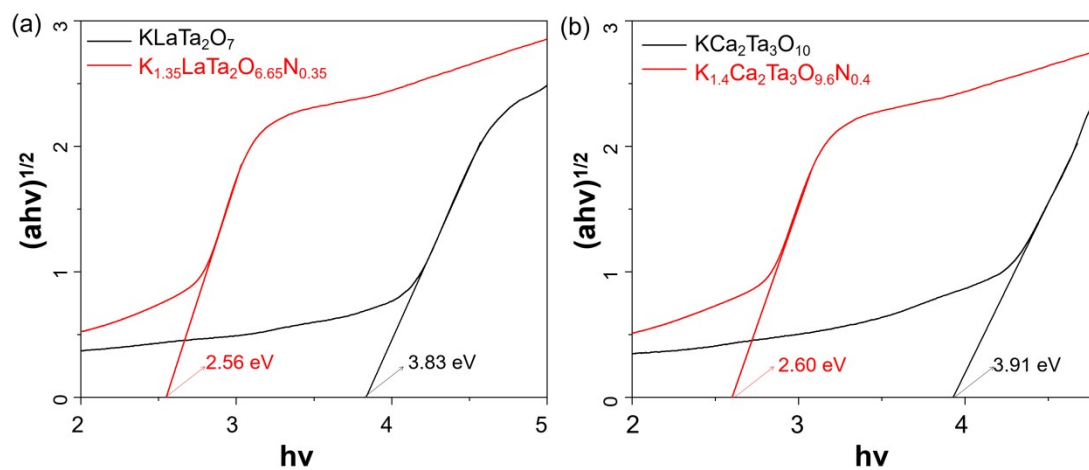

**Figure S6.** Tauc plots for the calculation of band gaps.

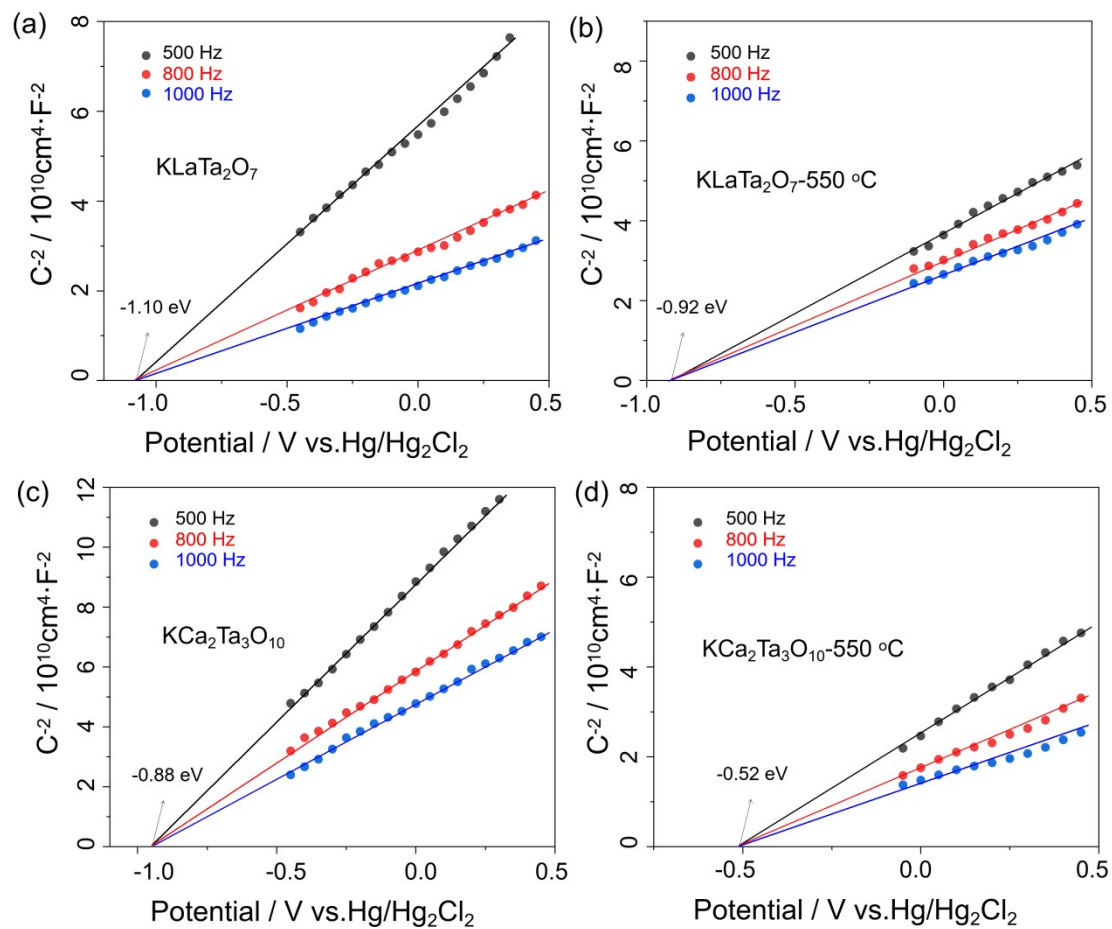

**Figure S7.** Mott-Schottky plots of  $\text{KLaTa}_2\text{O}_7$ ,  $\text{KCa}_2\text{Ta}_3\text{O}_{10}$ , and their nitridated samples at the frequency of 500, 800, and 1000 Hz.

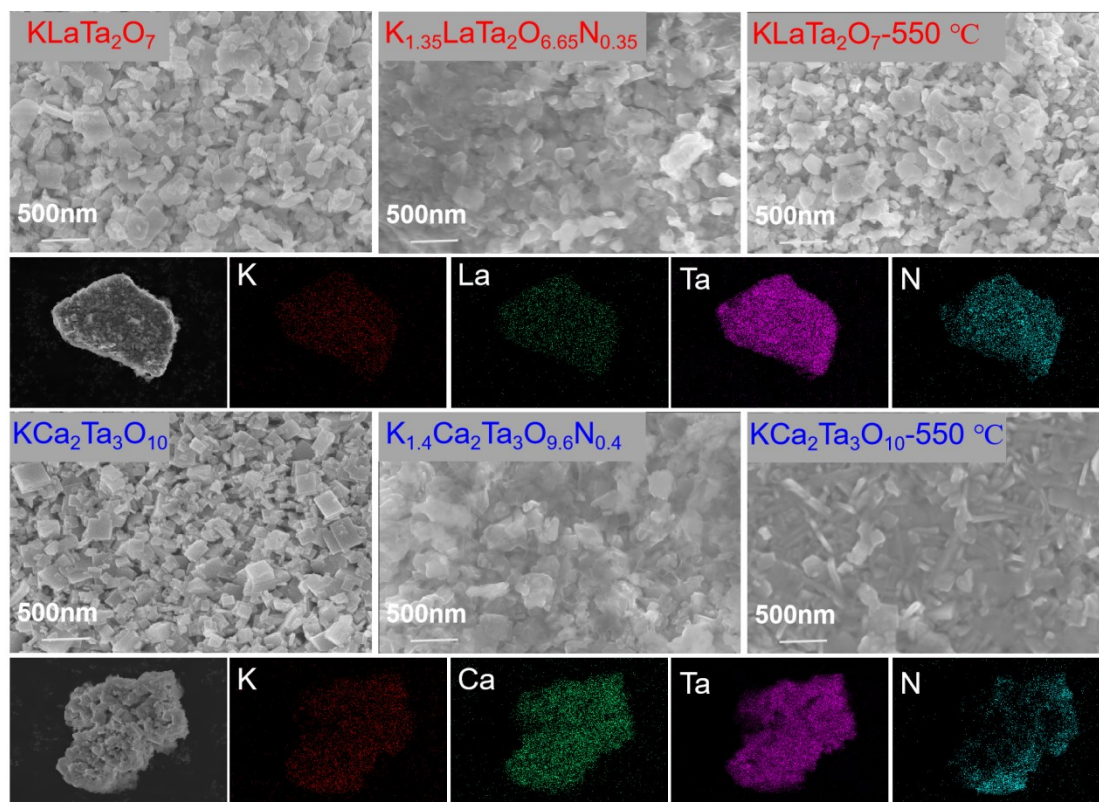

**Figure S8.** SEM images of  $\text{KLaTa}_2\text{O}_7$ ,  $\text{KCa}_2\text{Ta}_3\text{O}_{10}$ , and their nitrated products obtained at 500 °C and 550 °C. EDS elemental mapping images of the samples obtained at 500 °C.

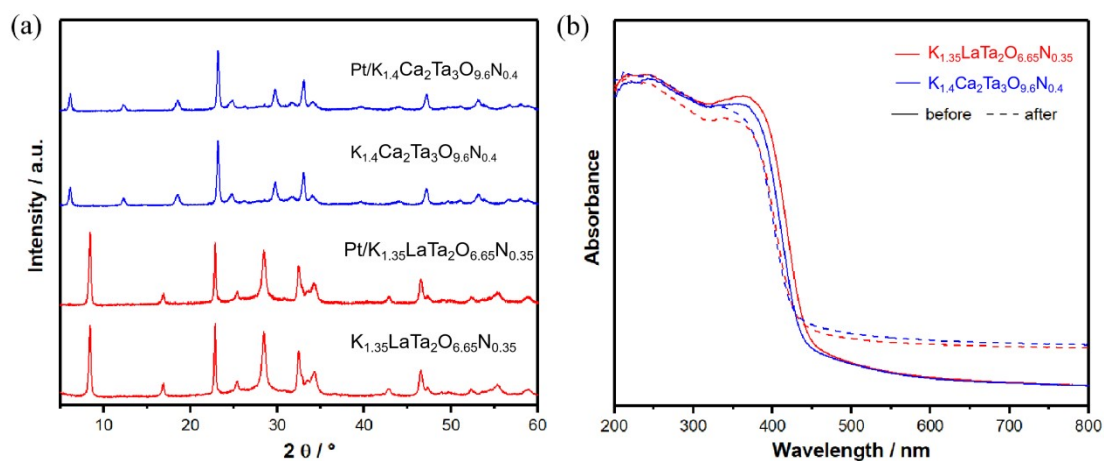

**Figure S9.** (a) XRD patterns and (b) DRS of  $\text{K}_{1.35}\text{LaTa}_2\text{O}_{6.65}\text{N}_{0.35}$  and  $\text{K}_{1.4}\text{Ca}_2\text{Ta}_3\text{O}_{9.6}\text{N}_{0.4}$  before and after Pt loading.

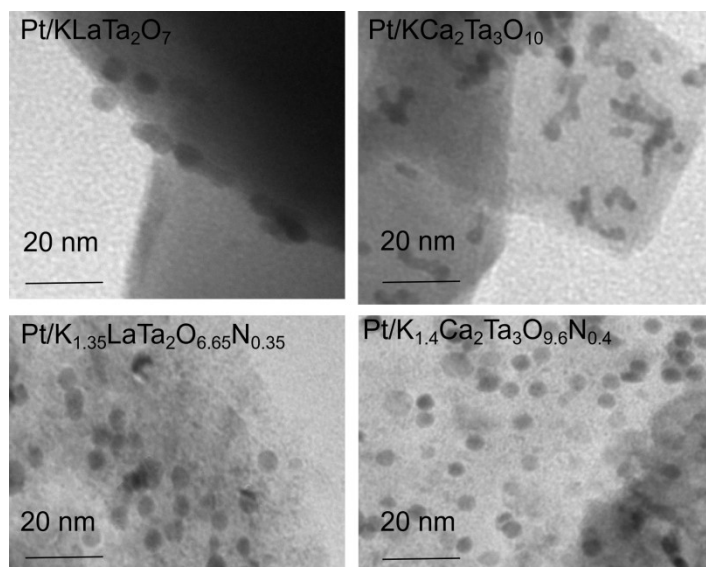

**Figure S10.** TEM images of Pt/KLaTa<sub>2</sub>O<sub>7</sub>, Pt/KCa<sub>2</sub>Ta<sub>3</sub>O<sub>10</sub>, Pt/K<sub>1.35</sub>LaTa<sub>2</sub>O<sub>6.65</sub>N<sub>0.35</sub>, and Pt/K<sub>1.4</sub>Ca<sub>2</sub>Ta<sub>3</sub>O<sub>9.6</sub>N<sub>0.4</sub> photocatalysts.

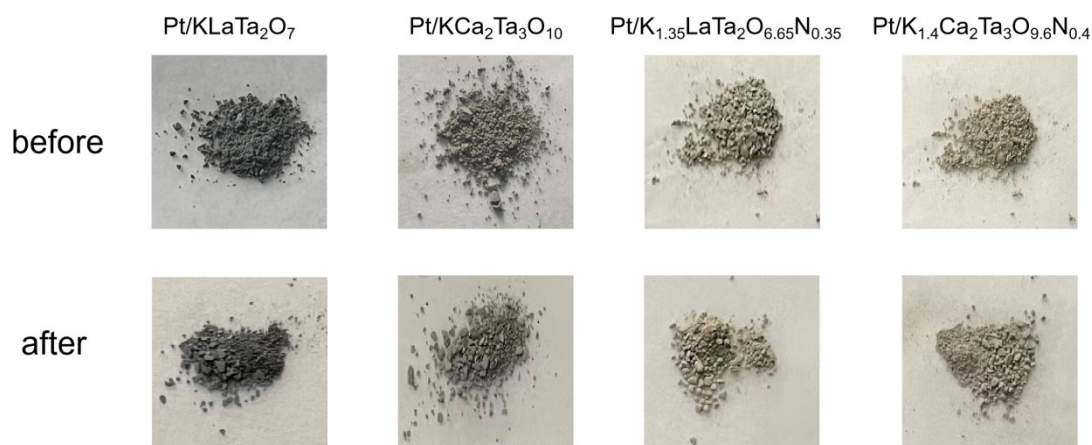

**Figure 11.** Sample colors before and after photocatalysis reactions.

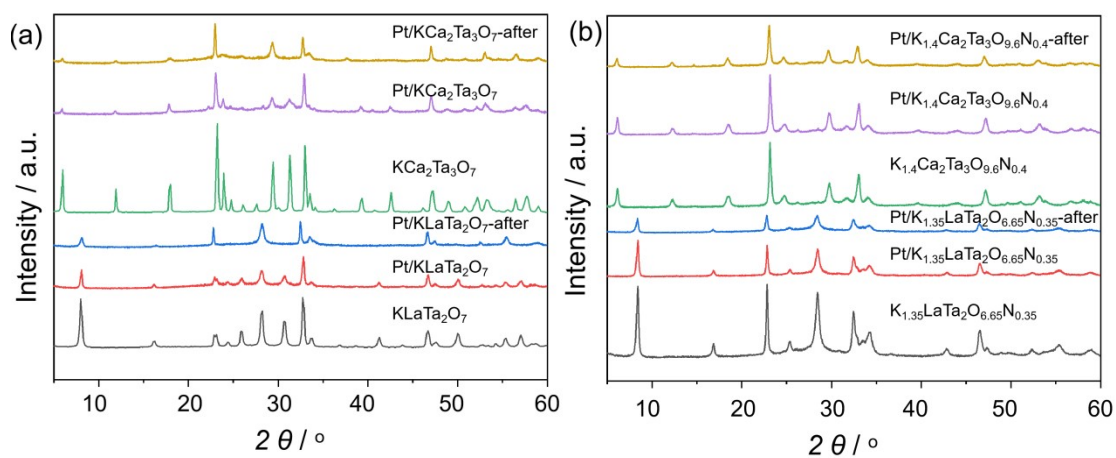

**Figure 12.** XRD patterns of the photocatalysts that before and after the photocatalysis reaction.



**Table S1.** Atomic composition of samples was determined by SEM-EDS. The molar ratio of oxide/K<sub>2</sub>CO<sub>3</sub> is 1:1.

| Samples     | Atomic ratio |          |          |
|-------------|--------------|----------|----------|
|             | K/Ta         | La/Ta    | Ca/Ta    |
| KLaTaO      | 0.43(3)      | 0.59(1)  | -        |
| KLaTaON-500 | 0.34(2)      | 0.54(3)  | -        |
| KLaTaON-550 | 0.30 (3)     | 0.63 (2) | -        |
| KCaTaO      | 0.34(2)      | -        | 0.67(1)  |
| KCaTaON-500 | 0.25(3)      | -        | 0.61(2)  |
| KCaTaON-550 | 0.19 (5)     | -        | 0.58 (4) |

**Table S2.** Atomic composition of samples was determined by SEM-EDS. The molar ratio of oxide/K<sub>2</sub>CO<sub>3</sub> is 1:0.

| Samples     | Atomic ratio |
|-------------|--------------|
|             | K/Ta         |
| KLaTaON-500 | 0.24(4)      |
| KLaTaON-550 | 0.20 (2)     |
| KCaTaON-500 | 0.29(2)      |
| KCaTaON-550 | 0.12 (3)     |

**Table S3.** The size of Pt nanoparticles on the sample surface, results were calculated from TEM images.

| Samples                                                                               | Size         |
|---------------------------------------------------------------------------------------|--------------|
| Pt/KLaTa <sub>2</sub> O <sub>7</sub>                                                  | 4.4±0.87nm   |
| Pt/K <sub>1.35</sub> LaTa <sub>2</sub> O <sub>6.65</sub> N <sub>0.35</sub>            | 4.45±0.075nm |
| Pt/KCa <sub>2</sub> Ta <sub>3</sub> O <sub>10</sub>                                   | 4.34±0.44nm  |
| Pt/K <sub>1.4</sub> Ca <sub>2</sub> Ta <sub>3</sub> O <sub>9.6</sub> N <sub>0.4</sub> | 4.38±0.63nm  |
